# Supplementary material for: A Robust Protocol to Increase NimbleGen SeqCap EZ Multiplexing Capacity to 96 Samples
Source: PubMed Central journal article supplement (PMC4397063; doi:10.1371/journal.pone.0123872), 2015-04-14

# Coverage Report for "Sample\_5"

## Overall Summary

Target Region Coverage

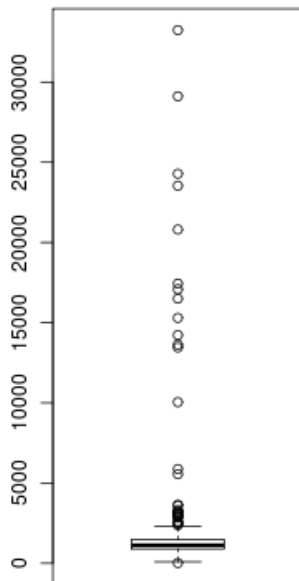

Cumulative Normalised Base-Coverage Plot

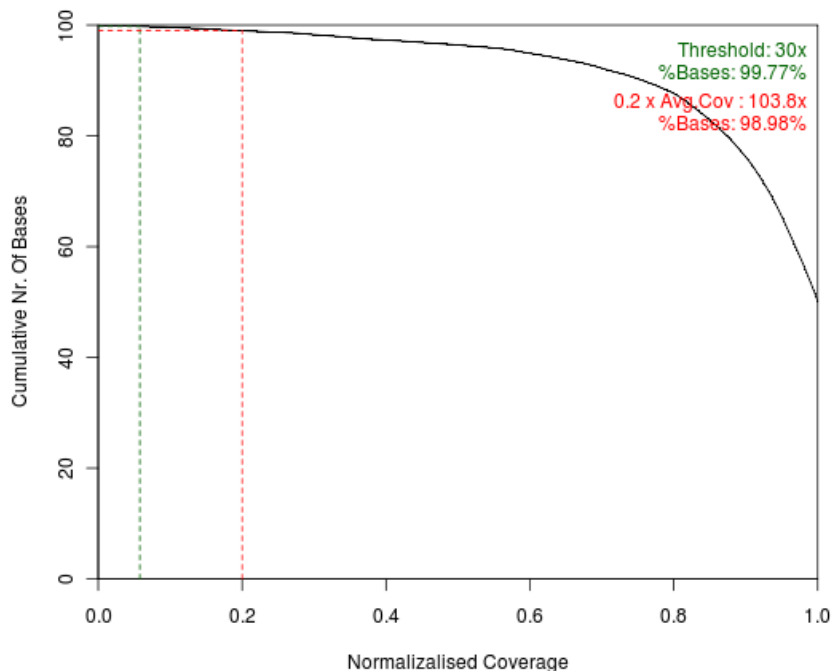

### Samtools Flagstat Summary

|                                              |        |
|----------------------------------------------|--------|
| In total (QC-passed reads)                   | 934147 |
| Duplicates                                   | 0      |
| Mapped (99.93%)                              | 933507 |
| Paired in sequencing                         | 932753 |
| Read1                                        | 466245 |
| Read2                                        | 466508 |
| Properly paired (98.71%)                     | 920678 |
| With itself and mate mapped                  | 932085 |
| Singletons (0.02%)                           | 190    |
| With mate mapped to a different chr          | 9568   |
| With mate mapped to a different chr (mapQ≥5) | 8018   |

### Target Region Coverage

|                              |        |
|------------------------------|--------|
| Number of Target Regions     | 360    |
| Minimal Region Coverage      | 15     |
| 25% Region Coverage          | 904    |
| 50% (Median) Region Coverage | 1124.5 |
| 75% Region Coverage          | 1489   |
| Maximal Region Coverage      | 33239  |
| Average Region Coverage      | 1907   |
| Mapped On Target             | 73.6   |
| <u>Target Base Coverage</u>  |        |
| Number of Target Bases       | 153387 |
| Average Base Coverage        | 519    |
| Non-Covered Bases            | 33     |

## Gene Summaries

### Legend:

**RED:** Coverage did not reach set threshold of 30

**ORANGE:** Coverage was incomplete for the exon. Overruled by red.

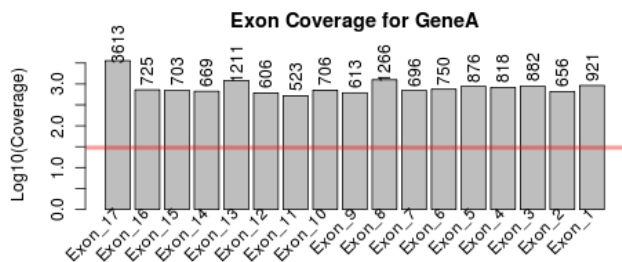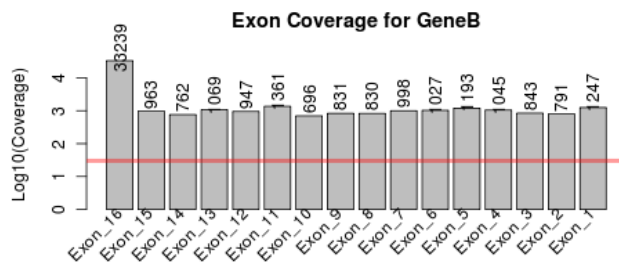

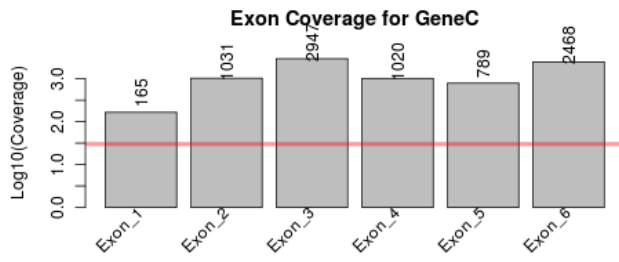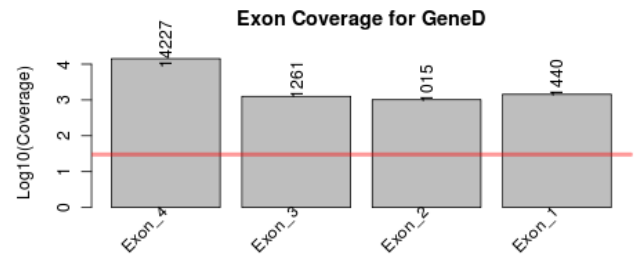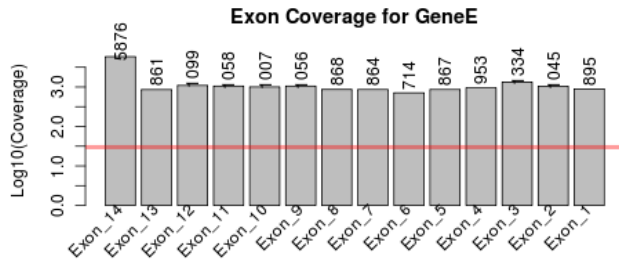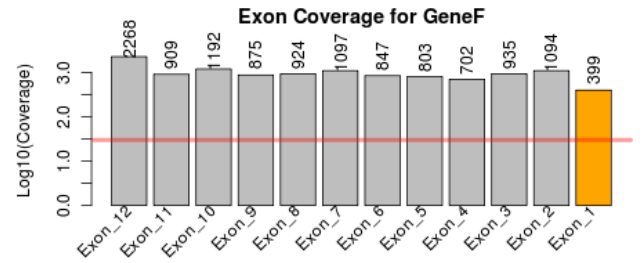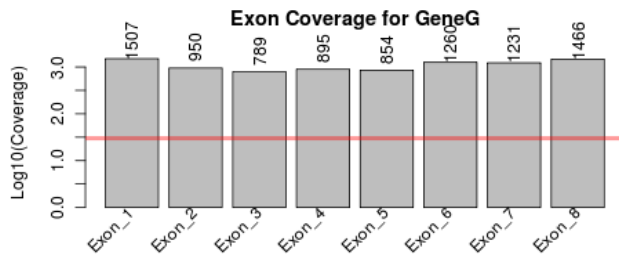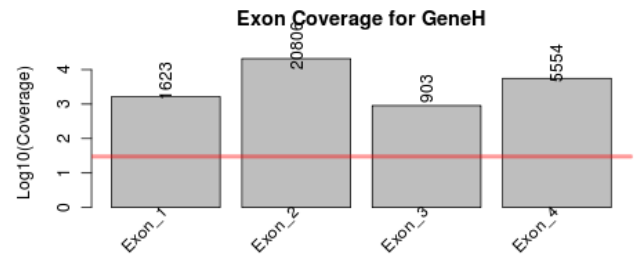

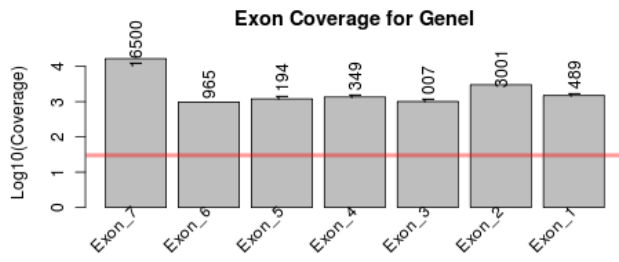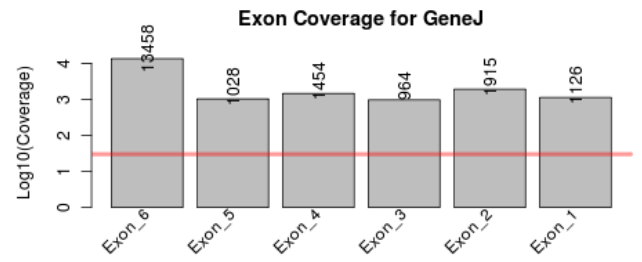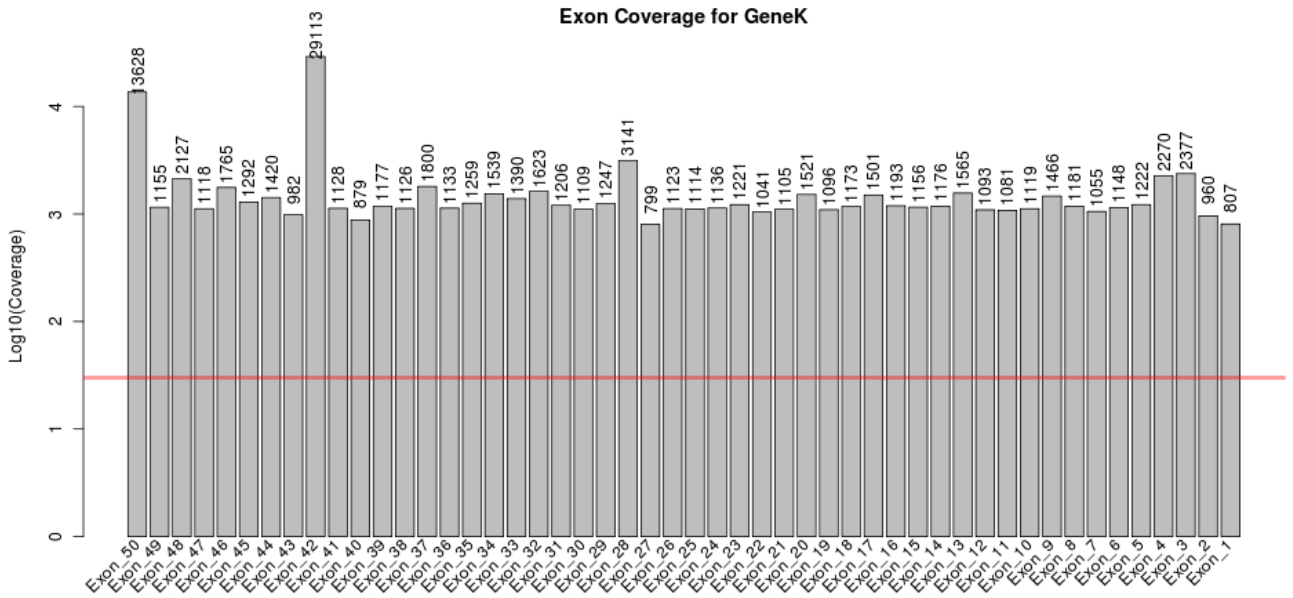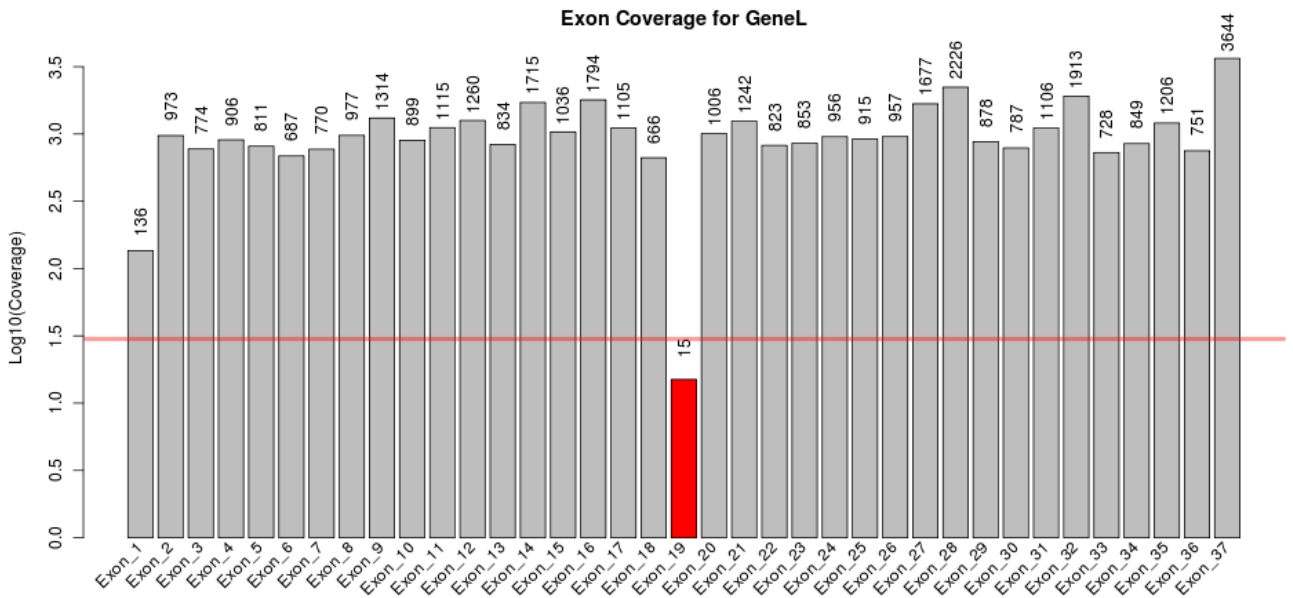

Exon Coverage for GeneM

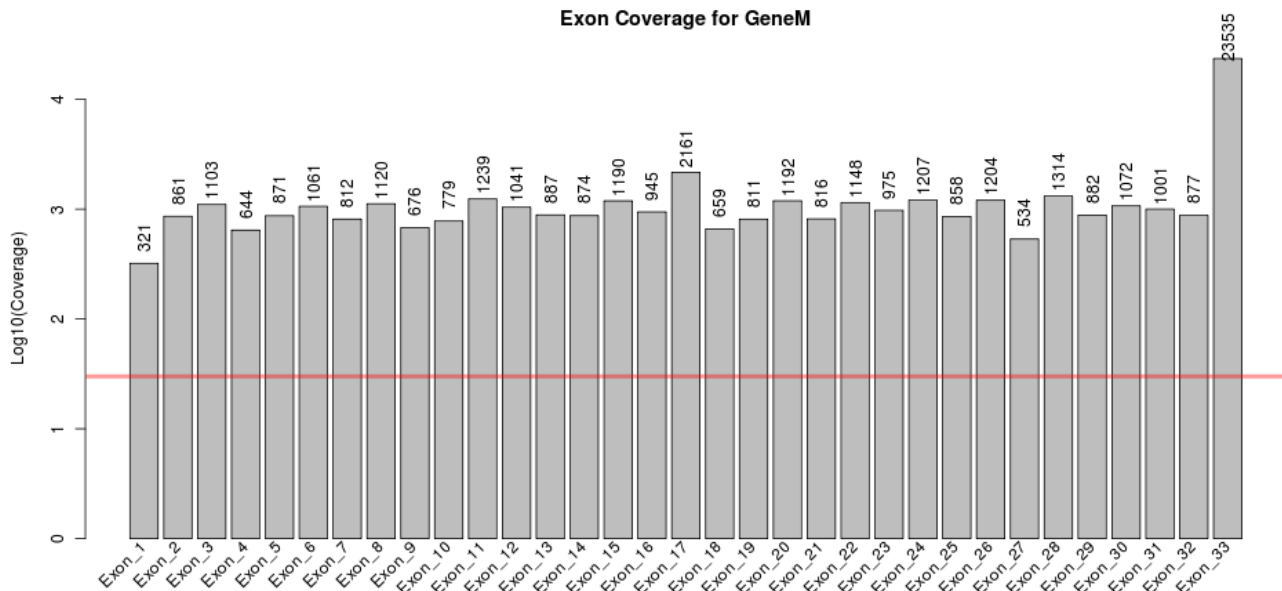

Exon Coverage for GeneN

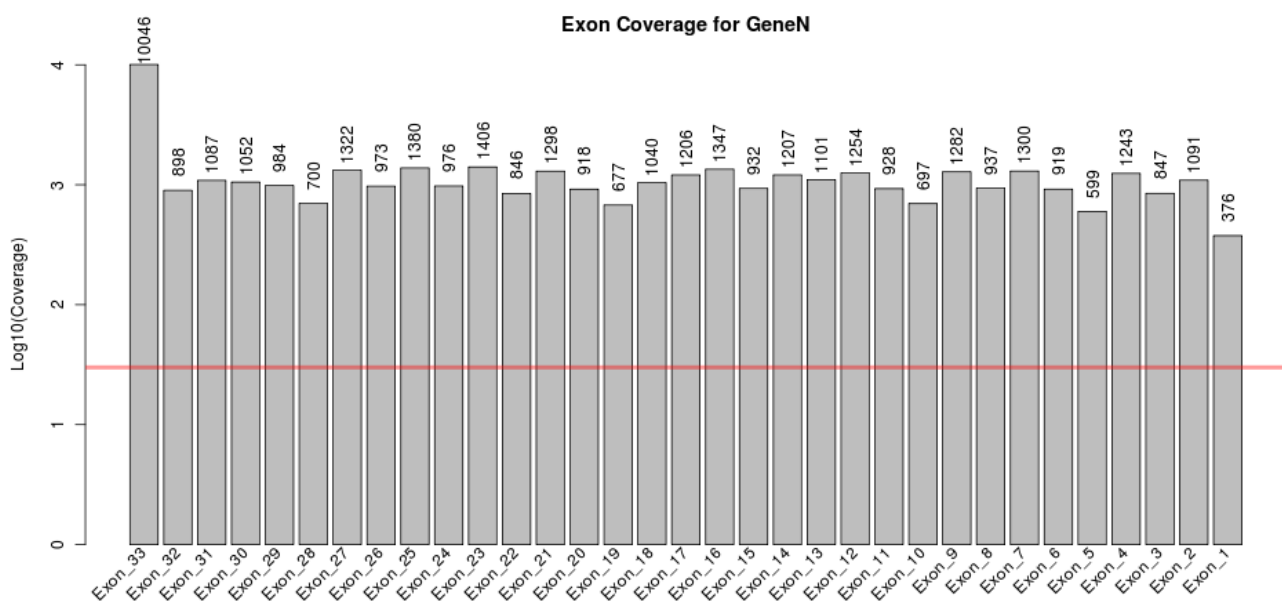

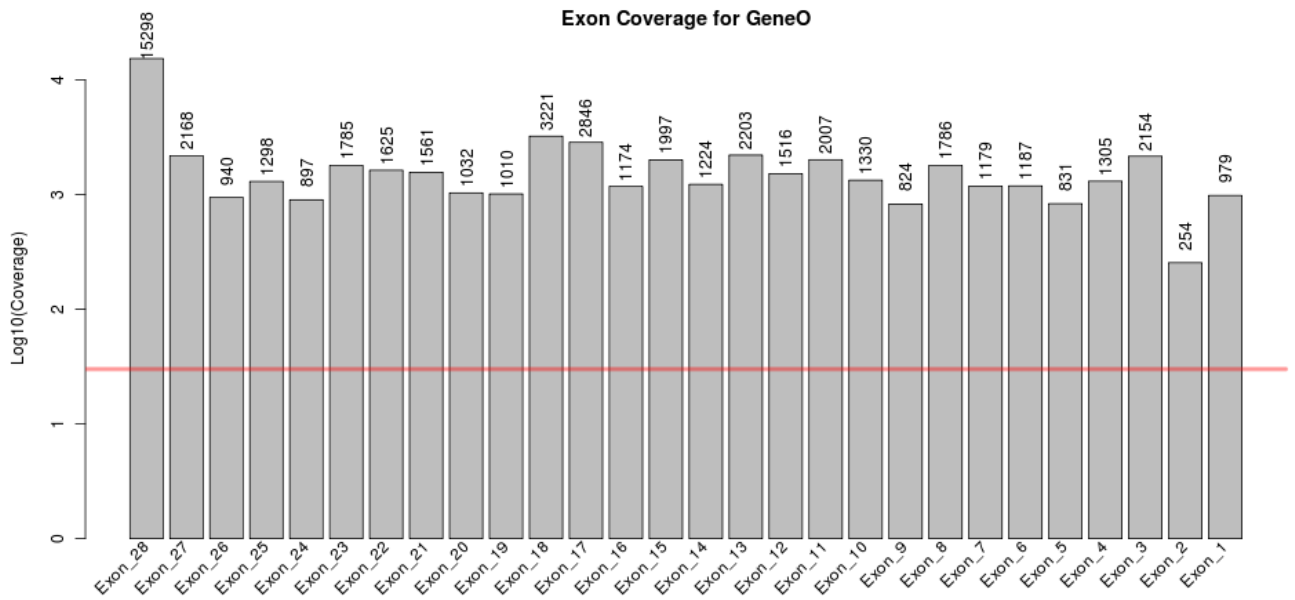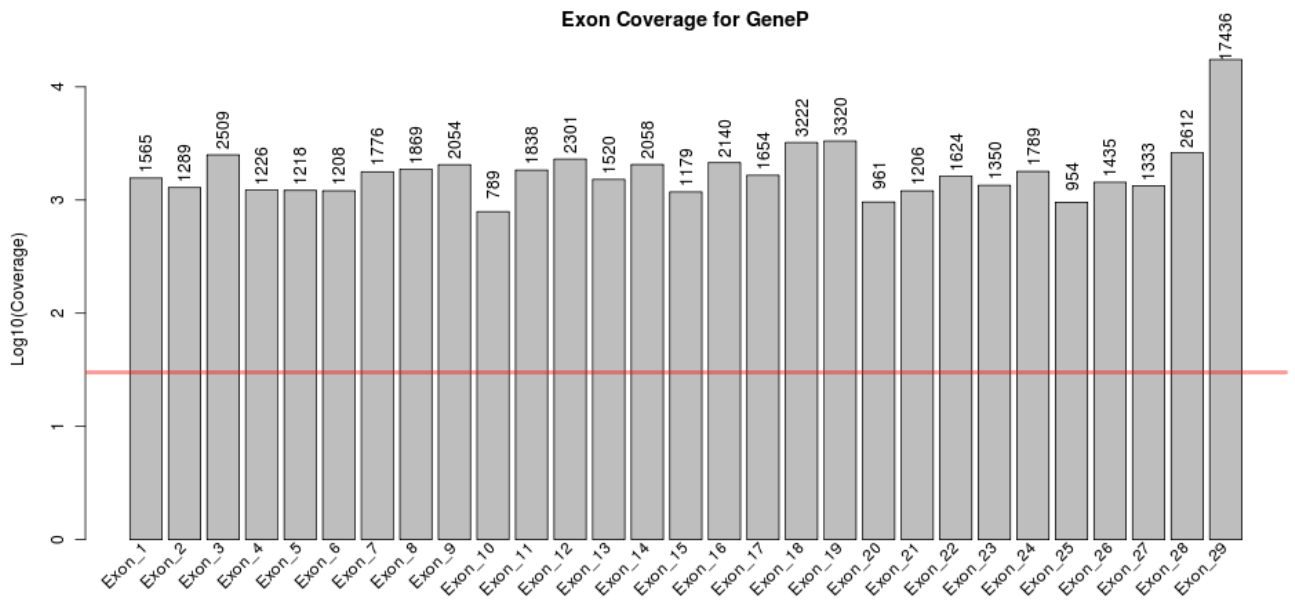

Exon Coverage for GeneQ

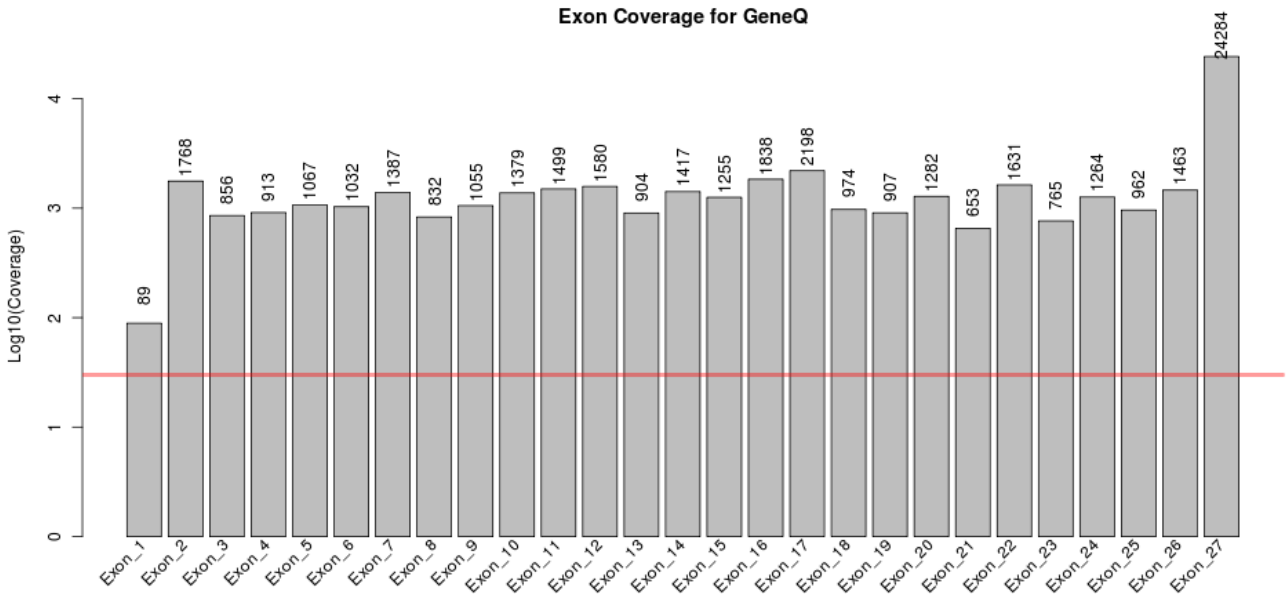

Exon Coverage for GeneR

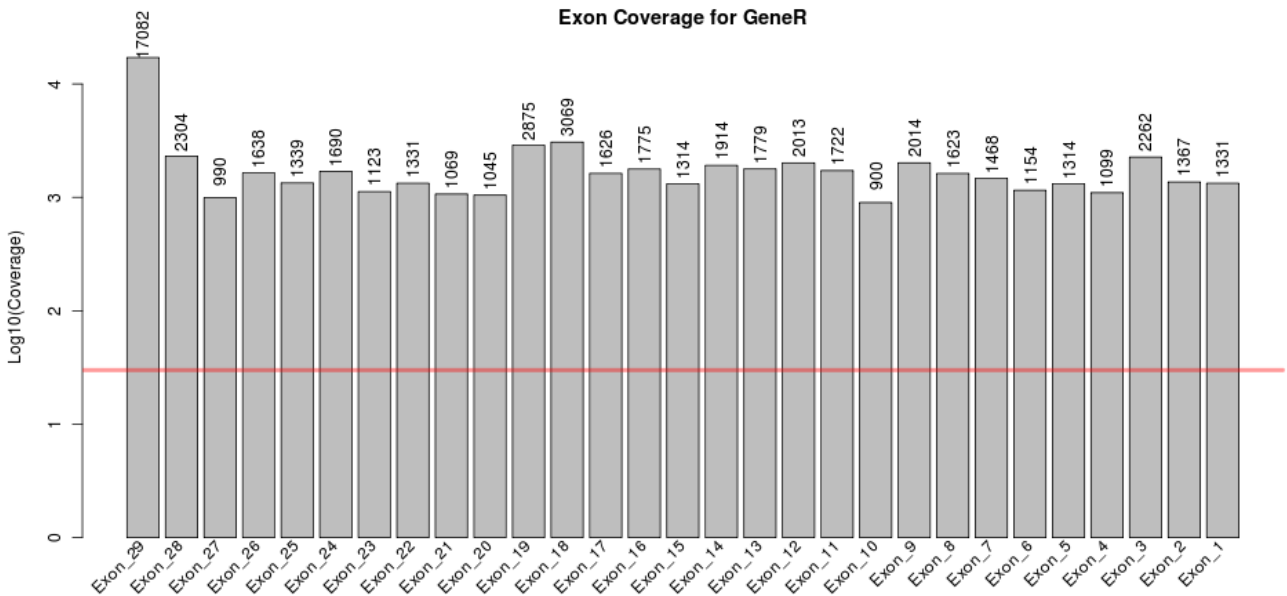

### Failed Exon Plots

NOTE: ALL exons were tested for local coverage <30

Coverage for GeneL Exon 19

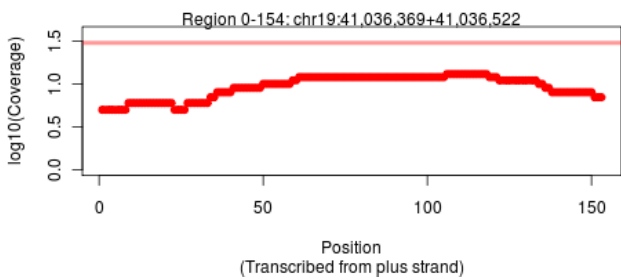

Coverage for GeneN Exon 1

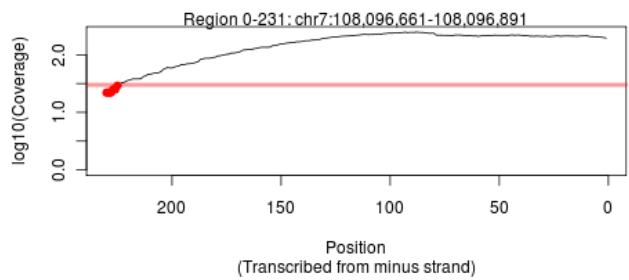

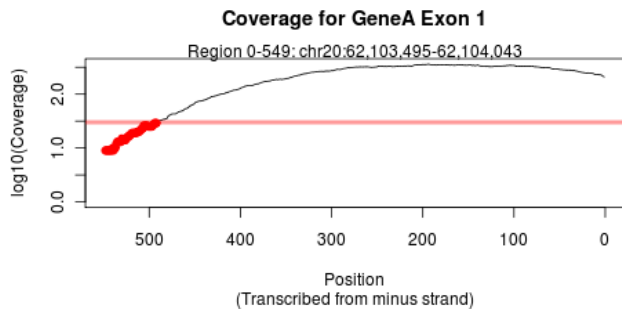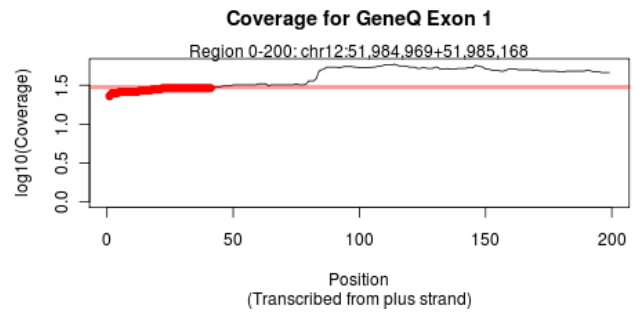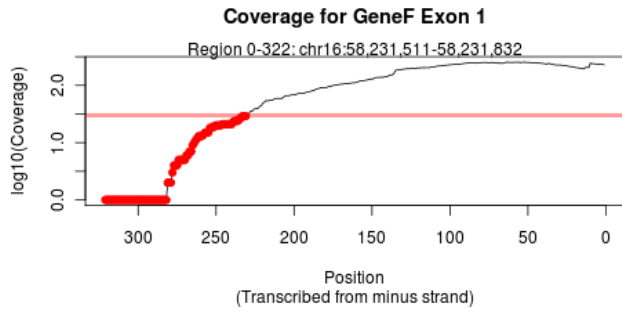

Supplement: pone.0123872.s002.pdf [file pone.0123872.s002.pdf]
